# Supplementary material for: Effect of PCV-VG ventilation on intraoperative respiratory mechanics and pulmonary function during prolonged robotic-assisted laparoscopic surgery in the Trendelenburg position
Source: Research Square preprint supplement (doi:10.21203/rs.3.rs-1990178/v1), 2022-08-29
Supplement: Supplementary file 1 [file ffcfdafc617b9697b4fc5ffe.docx]

1. Prolonged head-down position-Trendelenburg and pneumoperitoneum (more than 3h)
2. Robot-assisted laparoscopic surgery - emerging surgery
3. A new type of mechanical ventilation different from the previous volume-controlled ventilation - pressure-controlled volume-guaranteed mechanical ventilation (PCV-VG mechanical ventilation)
4. Experimental data from multiple time points were included, and multiple time points were compared one by one
